# Supplementary material for: Three 3D coordination polymers based on [1,1′:4′,1′′-terphenyl]-2′,4,4′′,5′-tetracarboxylate demonstrating magnetic properties and selective sensing of Al3+/Fe3+over mixed ions
Source: Royal Society of Chemistry journal article supplement (doi:10.1039/c4ra10124c), 2014-11-12
Supplement: c4ra10124c1.pdf [file c4ra10124c1.pdf]

## Supporting Information

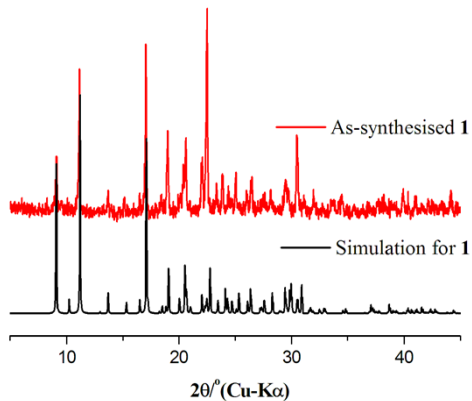

**Fig. S1** Simulated and experimental X-ray powder diffraction patterns for **1**.

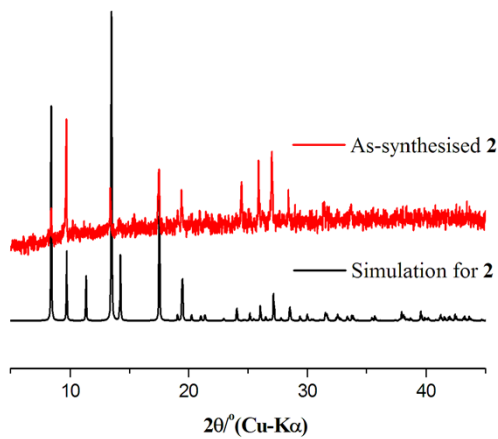

**Fig. S2** Simulated and experimental X-ray powder diffraction patterns for **2**.

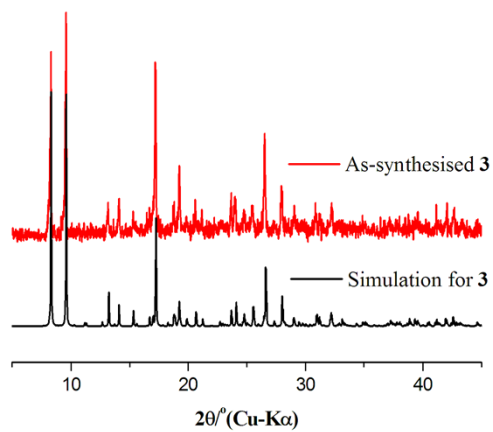

**Fig. S3** Simulated and experimental X-ray powder diffraction patterns for **3**.

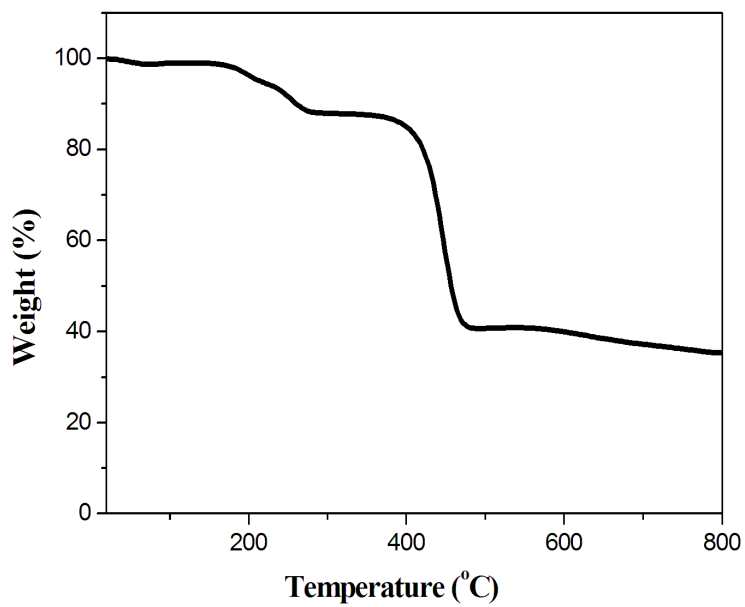

**Fig. S4** Thermal gravimetric analysis (TGA) for **1**.

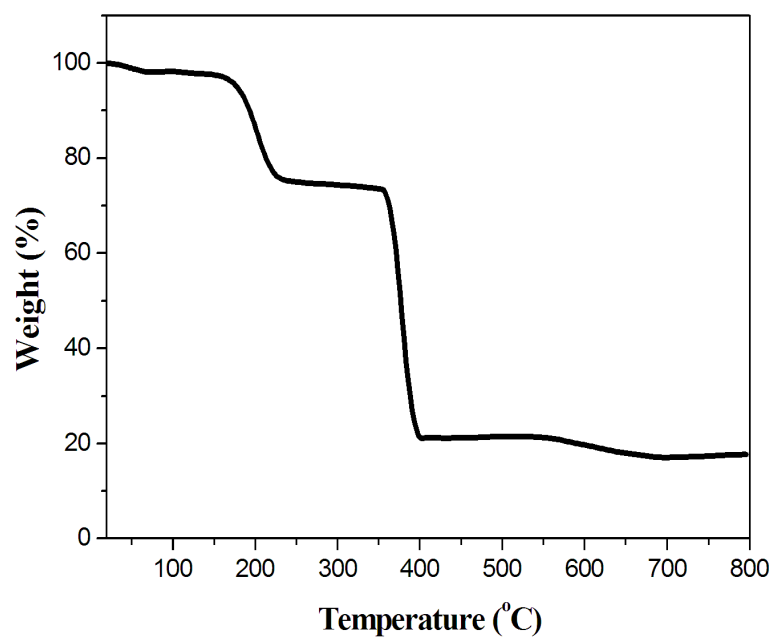

**Fig. S5** Thermal gravimetric analysis (TGA) for **2**.

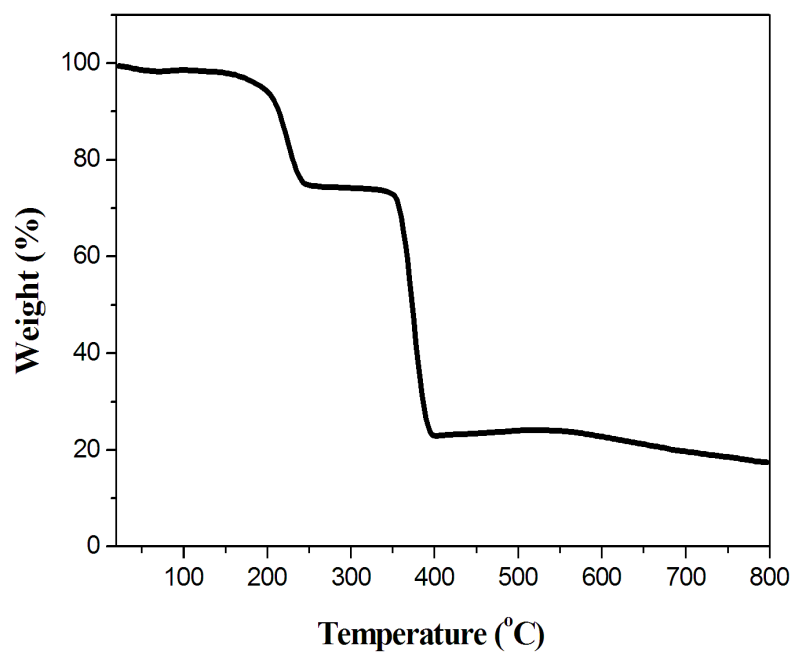

**Fig. S6** Thermal gravimetric analysis (TGA) for **3**.

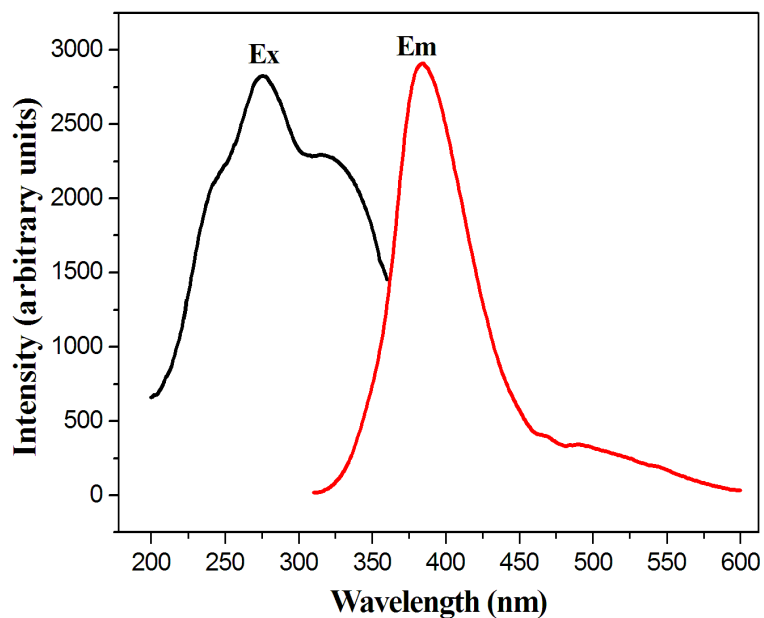

**Fig. 4** Luminescence excitation (at 274 nm) and emission (at 387 nm) spectra of **1** in the solid state at room temperature.

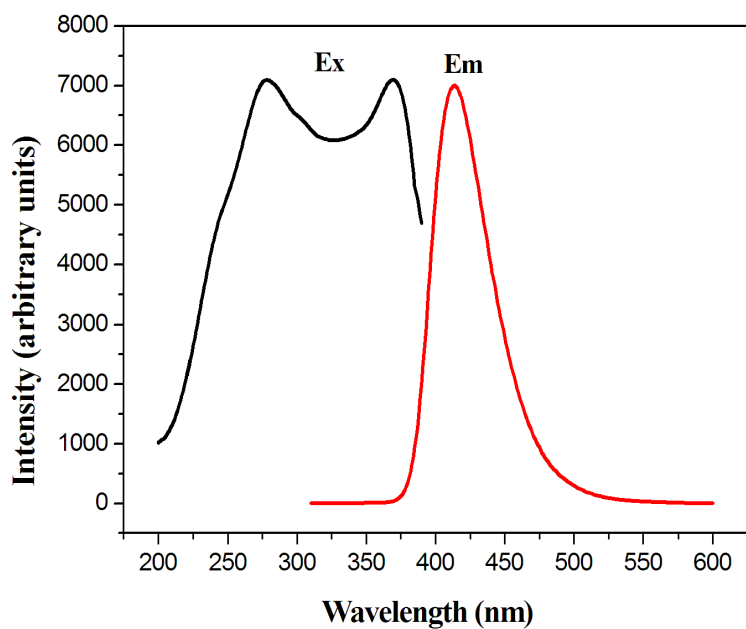

**Fig. S7** Excitation (at 413 nm) and emission (at 277 nm) spectra of H<sub>4</sub>TPTC in the solid state at room temperature.

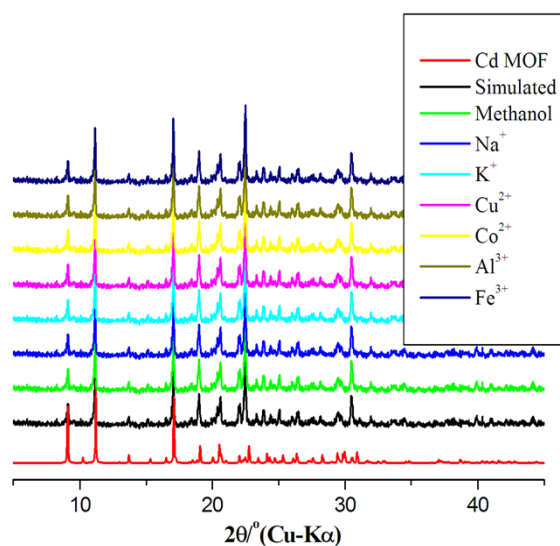

**Fig. S8** Powder X-ray diffraction profiles of **1**, as-synthesized and after immersed in methanol and different metal ions for 3 days.

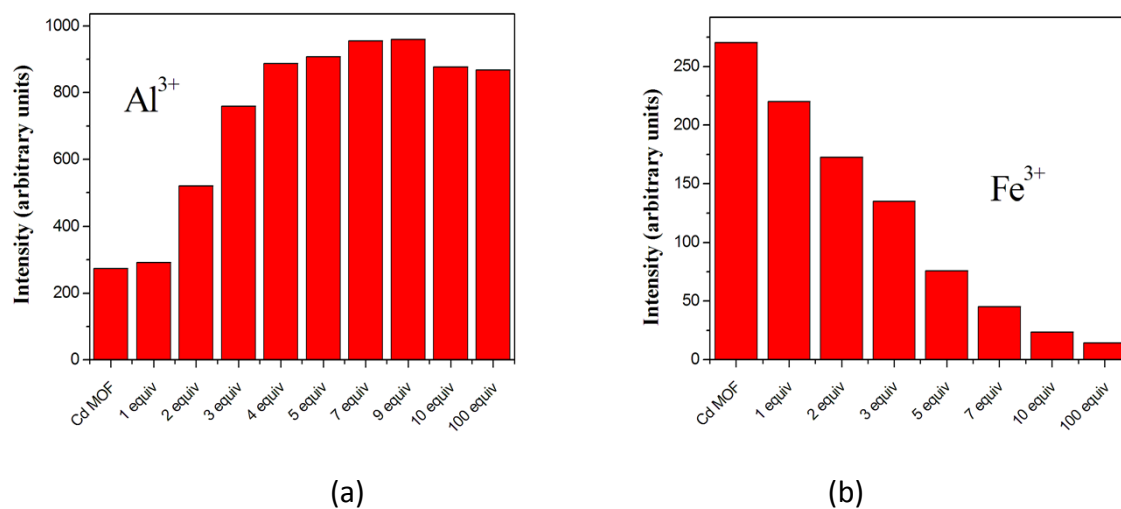

**Fig. S9** Comparison of the photoluminescence intensity of **1** in different different concentrations of  $\text{Al}^{3+}$  (a) and  $\text{Fe}^{3+}$  (b) one day in methanol solution (excited at 250 nm).

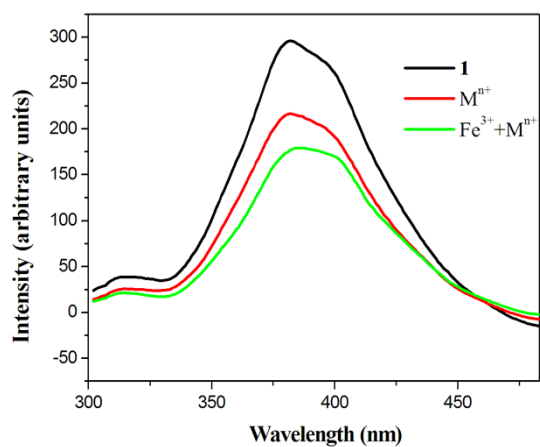

(a)

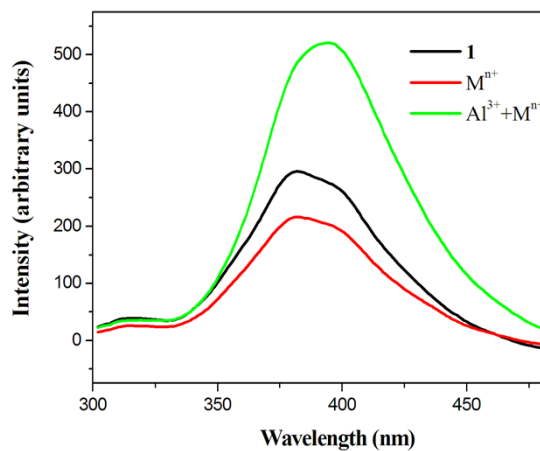

(b)

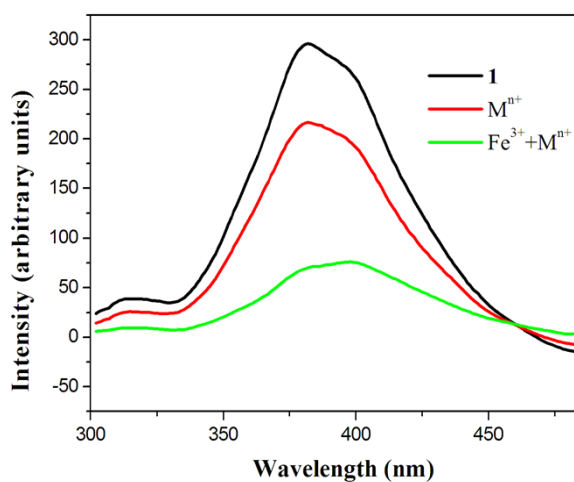

(c)

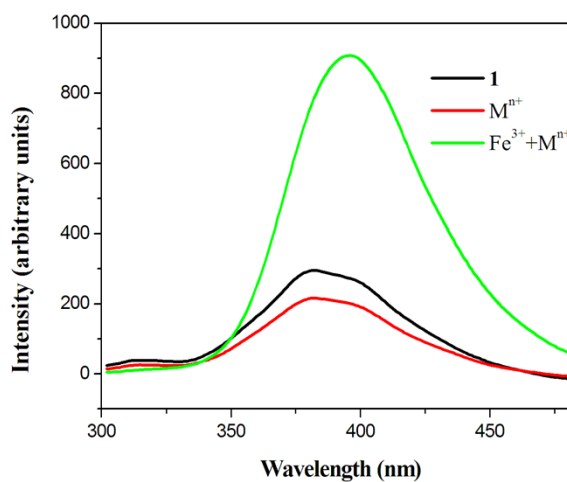

(d)

**Fig. S10** Comparison of the photoluminescence intensity of **1** in methanol suspension with the introduction of other  $M^{n+}$  ions ( $\text{Na}^+$ ,  $\text{Hg}^{2+}$ ,  $\text{Mg}^{2+}$ ,  $\text{Ni}^{2+}$ ,  $\text{Zn}^{2+}$ ) in the absence and presence of 2 equiv  $\text{Fe}^{3+}$  (a), 2 equiv  $\text{Al}^{3+}$  (b), 5 equiv  $\text{Fe}^{3+}$  (c) and 5 equiv  $\text{Al}^{3+}$  (d).
